# Supplementary material for: Comparison between Fractionated Dose and Single Dose of Cu-64 Trastuzumab Therapy in the NCI-N87 Gastric Cancer Mouse Model
Source: PubMed Central journal article supplement (PMC6801605; doi:10.3390/ijms20194708), 2019-09-23
Supplement: ijms-20-04708-s001.pdf [file ijms-20-04708-s001.pdf]

Supplementary Materials

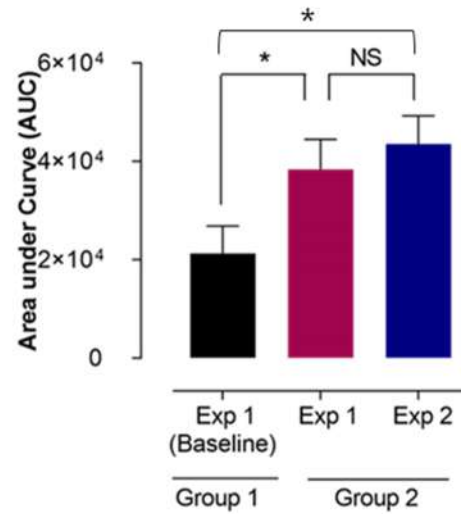

Group 2.  
 Exp 1: B3 Ab 150 µg on D0/Paclitaxel 40 mg/kg on D1  
 Exp 2: B3 Ab 150 µg on D0/ Paclitaxel 70 mg/kg on D1

Supplementary Figure S1. Increased dose of paclitaxel improves B3 accumulation. \*  $p < 0.005$ .

Table S1. Dosage scheme.

|              | Drug               | Day 0 | Day 1 | Day 2 | Day 3 | Day 4 | Day 5      |
|--------------|--------------------|-------|-------|-------|-------|-------|------------|
| Group 1      |                    |       |       |       |       |       |            |
| Experiment 1 | Alexa mAb B3* (µg) | 150   |       |       |       |       | Sacrificed |
| Group 2      |                    |       |       |       |       |       |            |
| Experiment 1 | Alexa mAb B3 (µg)  | 150   |       |       |       |       | Sacrificed |
|              | Paclitaxel (mg/kg) |       | 40    |       |       |       |            |
| Experiment 2 | Alexa mAb B3 (µg)  | 150   |       |       |       |       | Sacrificed |
|              | Paclitaxel (mg/kg) |       | 70    |       |       |       |            |

\*  $p < 0.005$ .
